# Supplementary material for: Genome-wide identification and characterization of ABA receptor pyrabactin resistance 1-like protein (PYL) family in oat
Source: PeerJ journal article supplement (doi:10.7717/peerj.16181), 2023-10-02
Supplement: supplementary_material.zip [file supplementary_material.zip]

## Sheet: CT value
	0h（CK）	2h			4h			8h			12h			24h
		NACL	PEG	ABA	NACL	PEG	ABA	NACL	PEG	ABA	NACL	PEG	ABA	NACL	PEG	ABA
PYL1	29.41	32.11	29.32	29.77	29.23	32.34	29.75	31.11	30.43	29.49	31.87	31.11	29.8	30.04	30	29.32
PYL1	28.32	31.11	28.12	29.01	28.34	31.56	29.65	30.13	29.56	29.4	30.65	30.23	28.95	29.12	29.12	28.75
PYL1	29.31	32.11	29.34	29.12	29.02	32.09	29.06	31.06	30.45	29.56	31.55	31.09	29.12	30.21	29.5	29.12
PYL2	27.85	30.01	28.54	27.32	30.11	31.01	28.05	30.44	29.54	27.69	30.09	29.23	27.89	30.11	28.65	27.98
PYL2	28.86	31.01	29.01	27.54	30.89	31.77	28.09	31.68	30.34	27.96	30.89	29.76	28.67	30.98	29.45	28.45
PYL2	29.03	31.23	29.32	27.65	31.22	32.12	28.12	31.44	30.67	28.21	31.11	29.98	28.55	31.08	29.57	28.71
PYL3	25.26	22.11	24.23	25.12	21.11	26.09	26.12	22.01	24.12	25.34	22.12	24.33	26.35	21.34	23.45	25.6
PYL3	25.18	21.34	24.33	25.32	21.09	25.78	26.21	22.12	24.33	25.32	22.04	24.68	26.33	21.09	23.12	25.75
PYL3	25.31	21.22	24.51	24.98	21.01	25.88	26.09	22.31	24.31	25.45	22.45	24.87	26.21	21.11	23.22	25.65
PYL4	23.16	25.16	22.78	24.61	25.17	26.12	25.28	27.33	24.45	25.24	27.45	25.78	25.89	26.2	23.97	25.7
PYL4	22.81	24.81	22.88	24.25	24.67	25.88	25.26	27.45	24.23	25.32	27.21	25.54	25.54	25.78	23.19	25.37
PYL4	23.27	24.55	23.03	24.56	24.99	26.21	25.14	27.76	24.44	25.66	27.66	25.89	25.87	26.22	23.87	25.76
PYL5	26.55	26.89	25.54	27.11	26.12	28.56	27.35	27.45	24.12	27.39	25.32	25.12	27.88	25.89	24.8	27.11
PYL5	26.57	27.09	25.1	26.98	25.88	28.22	27.66	27.33	24.44	27.33	25.11	25.45	27.56	26.07	24.57	27.54
PYL5	26.46	26.88	25.06	26.53	26.12	28.31	27.33	27.89	24.33	27.41	24.87	25.88	27.64	26.09	24.68	27.3
PYL6	22.91	25.4	22.12	19.55	25.41	25.23	19.86	28.12	25	19.55	27.12	25.77	19.55	26.12	22.41	19
PYL6	22.98	25.57	22.31	19.89	25.52	25.12	19.91	28.21	25.25	19.24	27.44	25.85	19.81	26.55	22.43	18.77
PYL6	22.95	25.32	22.09	20.01	25.31	25.33	20.02	28.02	25.11	19.32	27.31	25.9	19.44	26.32	22.77	18.56
PYL7	29.31	31.56	30.02	30.29	31.45	33.12	30.72	31.22	32.87	31.96	32.32	32.76	32.12	30.89	30.23	31.85
PYL7	29.01	31.45	29.67	30.21	31.22	33.01	30.67	30.88	32.44	31.86	32.11	32.66	32.05	30.56	30.01	31.5
PYL7	28.87	31.22	29.45	30.12	31.02	32.67	30.65	30.97	32.32	31.75	32.09	32.45	31.88	30.67	29.86	31.48
PYL8	33.33	34.67	34	35.12	33.56	37.12	36.36	35.7	37.32	36.45	35.99	33.45	36.45	34.67	32.31	34.62
PYL8	33.15	34.89	33.87	35.45	33.98	36.87	35.89	35.43	37.09	36.25	35.88	33.23	36.22	34.23	32.36	34.35
PYL8	33.17	34.12	34.32	35.1	33.58	37.09	36.21	35.69	36.99	36.22	35.98	33.12	36.26	34.19	32.49	34.57
PYL9	25.46	26.69	26	24.69	26.44	28.45	25.89	29.12	28.02	25.34	27.12	25.98	25.25	26.88	26.12	24.61
PYL9	25.44	26.28	25.34	24.86	26.28	28.67	25.94	28.99	27.67	25.26	27.33	26.09	25.68	26.71	26.09	24.21
PYL9	25.71	26.27	25.77	24.96	26.88	28.9	25.88	29.21	27.89	25.41	27.52	26.12	25.62	27.07	26.43	24.6
PYL10	29.29	30.12	29.09	30.12	30.34	32.23	30.6	32.7	31.12	30.69	32.77	31.09	30.75	30.3	30.55	30.75
PYL10	29.22	30.78	29.66	30.16	30.66	32.33	30.45	32.56	31.11	30.18	32.87	31.23	30.75	30.34	30.4	30.78
PYL10	29.03	30.23	29.23	30.21	30.21	32.01	30.54	32.36	30.89	30.21	32.95	31.06	30.54	29.88	30.12	30.67
actin	20.94	21.94	20.4	21.44	20.69	22.99	21.65	21.78	21.34	20.98	22.03	21.78	21.36	21.18	20.31	21.38
actin	21.36	21.78	21.18	21.21	20.53	22.78	21.41	21.99	21.09	21.22	22.05	21.73	21.56	20.86	20.21	21.25
actin	21.23	22.33	21.18	21.38	21.54	23.01	21.87	21.89	21.55	21.45	22.06	21.36	21.84	20.8	21.17	21.21

## Sheet: 2h VS CK
	0h（CK）	2h			ΔCT	ΔCT			ΔΔCT			2-ΔΔCT			Average
		NACL（T1）	PEG（T2）	ABA（T3）	CK	NACL（T1）	PEG（T2）	ABA（T3）	NACL（T1）	PEG（T2）	ABA（T3）	NACL（T1）	PEG（T2）	ABA（T3）	NACL（T1）	PEG（T2）	ABA（T3）
PYL1	29.41	32.11	29.32	29.77	8.23	10.09	8.4	8.43	-1.86	-0.17	-0.2	3.63008	1.12506	1.1487	3.79481	1.13005	1.12574
PYL1	28.32	31.11	28.12	29.01	7.14	9.09	7.2	7.67	-1.95	-0.06	-0.53	3.86375	1.04247	1.44393
PYL1	29.31	32.11	29.34	29.12	8.13	10.09	8.42	7.78	-1.96	-0.29	0.35	3.89062	1.22264	0.784584
PYL2	27.85	30.01	28.54	27.32	6.67	7.99	7.62	5.98	-1.32	-0.95	0.69	2.49666	1.93187	0.619854	2.51431	1.57488	0.440743
PYL2	28.86	31.01	29.01	27.54	7.68	8.99	8.09	6.2	-1.31	-0.41	1.48	2.47942	1.32869	0.358489
PYL2	29.03	31.23	29.32	27.65	7.85	9.21	8.4	6.31	-1.36	-0.55	1.54	2.56685	1.46409	0.343885
PYL3	25.26	22.11	24.23	25.12	4.08	0.09	3.31	3.78	3.99	0.77	0.3	0.0629347	0.586417	0.812252	0.0449162	0.646177	0.836837
PYL3	25.18	21.34	24.33	25.32	4	-0.68	3.41	3.98	4.68	0.59	0.02	0.0390103	0.664343	0.986233
PYL3	25.31	21.22	24.51	24.98	4.13	-0.8	3.59	3.64	4.93	0.54	0.49	0.0328036	0.687771	0.712025
PYL4	23.16	25.16	22.78	24.61	1.98	3.14	1.86	3.27	-1.16	0.12	-1.29	2.23457	0.920188	2.44528	1.94192	1.06372	2.35409
PYL4	22.81	24.81	22.88	24.25	1.63	2.79	1.96	2.91	-1.16	-0.33	-1.28	2.23457	1.25701	2.42839
PYL4	23.27	24.55	23.03	24.56	2.09	2.53	2.11	3.22	-0.44	-0.02	-1.13	1.3566	1.01396	2.18859
PYL5	26.55	26.89	25.54	27.11	5.37	4.87	4.62	5.77	0.5	0.75	-0.4	0.707107	0.594604	1.31951	0.751867	0.493544	1.14941
PYL5	26.57	27.09	25.1	26.98	5.39	5.07	4.18	5.64	0.32	1.21	-0.25	0.80107	0.432269	1.18921
PYL5	26.46	26.88	25.06	26.53	5.28	4.86	4.14	5.19	0.42	1.14	0.09	0.747425	0.45376	0.939523
PYL6	22.91	25.4	22.12	19.55	1.73	3.38	1.2	-1.79	-1.65	0.53	3.52	3.13834	0.692555	0.0871715	3.12993	0.701644	0.102971
PYL6	22.98	25.57	22.31	19.89	1.8	3.55	1.39	-1.45	-1.75	0.41	3.25	3.36359	0.752623	0.105112
PYL6	22.95	25.32	22.09	20.01	1.77	3.3	1.17	-1.33	-1.53	0.6	3.1	2.88786	0.659754	0.116629
PYL7	29.31	31.56	30.02	30.29	8.13	9.54	9.1	8.95	-1.41	-0.97	-0.82	2.65737	1.95884	1.76541	2.84564	1.88034	1.98346
PYL7	29.01	31.45	29.67	30.21	7.83	9.43	8.75	8.87	-1.6	-0.92	-1.04	3.03143	1.89212	2.05623
PYL7	28.87	31.22	29.45	30.12	7.69	9.2	8.53	8.78	-1.51	-0.84	-1.09	2.8481	1.79005	2.12874
PYL8	33.33	34.67	34	35.12	12.15	12.65	13.08	13.78	-0.5	-0.93	-1.63	1.41421	1.90528	3.09513	1.45317	2.17837	3.63776
PYL8	33.15	34.89	33.87	35.45	11.97	12.87	12.95	14.11	-0.9	-0.98	-2.14	1.86607	1.97247	4.40762
PYL8	33.17	34.12	34.32	35.1	11.99	12.1	13.4	13.76	-0.11	-1.41	-1.77	1.07923	2.65737	3.41054
PYL9	25.46	26.69	26	24.69	4.28	4.67	5.08	3.35	-0.39	-0.8	0.93	1.31039	1.7411	0.524858	1.04466	1.36891	0.551928
PYL9	25.44	26.28	25.34	24.86	4.26	4.26	4.42	3.52	0	-0.16	0.74	1	1.11729	0.598739
PYL9	25.71	26.27	25.77	24.96	4.53	4.25	4.85	3.62	0.28	-0.32	0.91	0.823591	1.24833	0.532185
PYL10	29.29	30.12	29.09	30.12	8.11	8.1	8.17	8.78	0.01	-0.06	-0.67	0.993092	1.04247	1.59107	1.3079	1.3475	1.77871
PYL10	29.22	30.78	29.66	30.16	8.04	8.76	8.74	8.82	-0.72	-0.7	-0.78	1.64718	1.6245	1.71713
PYL10	29.03	30.23	29.23	30.21	7.85	8.21	8.31	8.87	-0.36	-0.46	-1.02	1.28343	1.37554	2.02792
actin	20.94	21.94	20.4	21.44
actin	21.36	21.78	21.18	21.21
actin	21.23	22.33	21.18	21.38
Average	21.1767	22.0167	20.92	21.3433

## Sheet: 4h VS CK
	0h（CK）	4h			ΔCT	ΔCT			ΔΔCT			2-ΔΔCT			Average
		NACL（T1）	PEG（T2）	ABA（T3）	CK	NACL（T1）	PEG（T2）	ABA（T3）	NACL（T1）	PEG（T2）	ABA（T3）	NACL（T1）	PEG（T2）	ABA（T3）	NACL（T1）	PEG（T2）	ABA（T3）
PYL1	29.41	29.23	32.34	29.75	8.23	8.31	9.41	8.11	-0.08	-1.18	0.12	1.05702	2.26577	0.920188	1.08354	2.37223	1.11972
PYL1	28.32	28.34	31.56	29.65	7.14	7.42	8.63	8.01	-0.28	-1.49	-0.87	1.21419	2.80889	1.82766
PYL1	29.31	29.02	32.09	29.06	8.13	8.1	9.16	7.42	0.03	-1.03	0.71	0.97942	2.04202	0.61132
PYL2	27.85	30.11	31.01	28.05	6.67	9.19	8.08	6.41	-2.52	-1.41	0.26	5.73582	2.65737	0.835088	5.36351	2.47449	0.549432
PYL2	28.86	30.89	31.77	28.09	7.68	9.97	8.84	6.45	-2.29	-1.16	1.23	4.89056	2.23457	0.426317
PYL2	29.03	31.22	32.12	28.12	7.85	10.3	9.19	6.48	-2.45	-1.34	1.37	5.46416	2.53151	0.386891
PYL3	25.26	21.11	26.09	26.12	4.08	0.19	3.16	4.48	3.89	0.92	-0.4	0.0674518	0.528509	1.31951	0.0661863	0.473495	1.35079
PYL3	25.18	21.09	25.78	26.21	4	0.17	2.85	4.57	3.83	1.15	-0.57	0.0703162	0.450625	1.48452
PYL3	25.31	21.01	25.88	26.09	4.13	0.09	2.95	4.45	4.04	1.18	-0.32	0.0607909	0.441351	1.24833
PYL4	23.16	25.17	26.12	25.28	1.98	4.25	3.19	3.64	-2.27	-1.21	-1.66	4.82323	2.31338	3.16017	4.3717	2.36385	3.2633
PYL4	22.81	24.67	25.88	25.26	1.63	3.75	2.95	3.62	-2.12	-1.32	-1.99	4.34694	2.49666	3.97237
PYL4	23.27	24.99	26.21	25.14	2.09	4.07	3.28	3.5	-1.98	-1.19	-1.41	3.94493	2.28153	2.65737
PYL5	26.55	26.12	28.56	27.35	5.37	5.2	5.63	5.71	0.17	-0.26	-0.34	0.888843	1.19748	1.26576	0.859054	1.06743	1.38067
PYL5	26.57	25.88	28.22	27.66	5.39	4.96	5.29	6.02	0.43	0.1	-0.63	0.742262	0.933033	1.54756
PYL5	26.46	26.12	28.31	27.33	5.28	5.2	5.38	5.69	0.08	-0.1	-0.41	0.946058	1.07177	1.32869
PYL6	22.91	25.41	25.23	19.86	1.73	4.49	2.3	-1.78	-2.76	-0.57	3.51	6.77396	1.48452	0.0877778	6.62862	1.44749	0.0899128
PYL6	22.98	25.52	25.12	19.91	1.8	4.6	2.19	-1.73	-2.8	-0.39	3.53	6.9644	1.31039	0.0865693
PYL6	22.95	25.31	25.33	20.02	1.77	4.39	2.4	-1.62	-2.62	-0.63	3.39	6.1475	1.54756	0.0953912
PYL7	29.31	31.45	33.12	30.72	8.13	10.53	10.19	9.08	-2.4	-2.06	-0.95	5.27803	4.16986	1.93187	5.37774	4.35592	2.24198
PYL7	29.01	31.22	33.01	30.67	7.83	10.3	10.08	9.03	-2.47	-2.25	-1.2	5.54044	4.75683	2.2974
PYL7	28.87	31.02	32.67	30.65	7.69	10.1	9.74	9.01	-2.41	-2.05	-1.32	5.31474	4.14106	2.49666
PYL8	33.33	33.56	37.12	36.36	12.15	12.64	14.19	14.72	-0.49	-2.04	-2.57	1.40444	4.11246	5.93809	1.70809	4.17679	5.59142
PYL8	33.15	33.98	36.87	35.89	11.97	13.06	13.94	14.25	-1.09	-1.97	-2.28	2.12874	3.91768	4.85678
PYL8	33.17	33.58	37.09	36.21	11.99	12.66	14.16	14.57	-0.67	-2.17	-2.58	1.59107	4.50023	5.9794
PYL9	25.46	26.44	28.45	25.89	4.28	5.52	5.52	4.25	-1.24	-1.24	0.03	2.36199	2.36199	0.97942	2.4	2.62156	0.941812
PYL9	25.44	26.28	28.67	25.94	4.26	5.36	5.74	4.3	-1.1	-1.48	-0.04	2.14355	2.78949	1.02811
PYL9	25.71	26.88	28.9	25.88	4.53	5.96	5.97	4.24	-1.43	-1.44	0.29	2.69447	2.71321	0.817902
PYL10	29.29	30.34	32.23	30.6	8.11	9.42	9.3	8.96	-1.31	-1.19	-0.85	2.47942	2.28153	1.8025	2.81388	2.39802	1.85943
PYL10	29.22	30.66	32.33	30.45	8.04	9.74	9.4	8.81	-1.7	-1.36	-0.77	3.24901	2.56685	1.70527
PYL10	29.03	30.21	32.01	30.54	7.85	9.29	9.08	8.9	-1.44	-1.23	-1.05	2.71321	2.34567	2.07053
actin	20.94	20.69	22.99	21.65
actin	21.36	20.53	22.78	21.41
actin	21.23	21.54	23.01	21.87
Average	21.1767	20.92	22.9267	21.6433

## Sheet: 8h VS CK
	0h（CK）	8h			ΔCT	ΔCT			ΔΔCT			2-ΔΔCT			Average
		NACL（T1）	PEG（T2）	ABA（T3）	CK	NACL（T1）	PEG（T2）	ABA（T3）	NACL（T1）	PEG（T2）	ABA（T3）	NACL（T1）	PEG（T2）	ABA（T3）	NACL（T1）	PEG（T2）	ABA（T3）
PYL1	29.41	31.11	30.43	29.49	8.23	9.22	9.1	8.27	-0.99	-0.87	-0.04	1.98618	1.82766	1.02811	2.06199	1.98086	1.41368
PYL1	28.32	30.13	29.56	29.4	7.14	8.24	8.23	8.18	-1.1	-1.09	-1.04	2.14355	2.12874	2.05623
PYL1	29.31	31.06	30.45	29.56	8.13	9.17	9.12	8.34	-1.04	-0.99	-0.21	2.05623	1.98618	1.15669
PYL2	27.85	30.44	29.54	27.69	6.67	8.55	8.21	6.47	-1.88	-1.54	0.2	3.68075	2.90795	0.870551	3.74889	2.74362	0.647579
PYL2	28.86	31.68	30.34	27.96	7.68	9.79	9.01	6.74	-2.11	-1.33	0.94	4.31691	2.51403	0.521233
PYL2	29.03	31.44	30.67	28.21	7.85	9.55	9.34	6.99	-1.7	-1.49	0.86	3.24901	2.80889	0.550953
PYL3	25.26	22.01	24.12	25.34	4.08	0.12	2.79	4.12	3.96	1.29	-0.04	0.0642571	0.408951	1.02811	0.0713248	0.453192	1.05722
PYL3	25.18	22.12	24.33	25.32	4	0.23	3	4.1	3.77	1	-0.1	0.0733022	0.5	1.07177
PYL3	25.31	22.31	24.31	25.45	4.13	0.42	2.98	4.23	3.71	1.15	-0.1	0.076415	0.450625	1.07177
PYL4	23.16	27.33	24.45	25.24	1.98	5.44	3.12	4.02	-3.46	-1.14	-2.04	11.0043	2.20381	4.11246	13.3279	2.21445	4.91705
PYL4	22.81	27.45	24.23	25.32	1.63	5.56	2.9	4.1	-3.93	-1.27	-2.47	15.2422	2.41162	5.54044
PYL4	23.27	27.76	24.44	25.66	2.09	5.87	3.11	4.44	-3.78	-1.02	-2.35	13.737	2.02792	5.09824
PYL5	26.55	27.45	24.12	27.39	5.37	5.56	2.79	6.17	-0.19	2.58	-0.8	1.14076	0.167241	1.7411	1.2744	0.193012	1.75578
PYL5	26.57	27.33	24.44	27.33	5.39	5.44	3.11	6.11	-0.05	2.28	-0.72	1.03526	0.205898	1.64718
PYL5	26.46	27.89	24.33	27.41	5.28	6	3	6.19	-0.72	2.28	-0.91	1.64718	0.205898	1.87905
PYL6	22.91	28.12	25	19.55	1.73	6.23	3.67	-1.67	-4.5	-1.94	3.4	22.6274	3.83706	0.0947323	22.0352	4.07061	0.0820305
PYL6	22.98	28.21	25.25	19.24	1.8	6.32	3.92	-1.98	-4.52	-2.12	3.78	22.9433	4.34694	0.0727958
PYL6	22.95	28.02	25.11	19.32	1.77	6.13	3.78	-1.9	-4.36	-2.01	3.67	20.5348	4.02782	0.0785633
PYL7	29.31	31.22	32.87	31.96	8.13	9.33	11.54	10.74	-1.2	-3.41	-2.61	2.2974	10.6295	6.10504	2.38425	10.0641	6.75936
PYL7	29.01	30.88	32.44	31.86	7.83	8.99	11.11	10.64	-1.16	-3.28	-2.81	2.23457	9.71356	7.01285
PYL7	28.87	30.97	32.32	31.75	7.69	9.08	10.99	10.53	-1.39	-3.3	-2.84	2.62079	9.84916	7.1602
PYL8	33.33	35.7	37.32	36.45	12.15	13.81	15.99	15.23	-1.66	-3.84	-3.08	3.16017	14.3204	8.45614	3.21188	13.6272	8.28384
PYL8	33.15	35.43	37.09	36.25	11.97	13.54	15.76	15.03	-1.57	-3.79	-3.06	2.96905	13.8326	8.33973
PYL8	33.17	35.69	36.99	36.22	11.99	13.8	15.66	15	-1.81	-3.67	-3.01	3.50642	12.7286	8.05564
PYL9	25.46	29.12	28.02	25.34	4.28	7.23	6.69	4.12	-2.95	-2.41	0.16	7.72749	5.31474	0.895025	7.268	4.54229	0.847877
PYL9	25.44	28.99	27.67	25.26	4.26	7.1	6.34	4.04	-2.84	-2.08	0.22	7.1602	4.22807	0.858565
PYL9	25.71	29.21	27.89	25.41	4.53	7.32	6.56	4.19	-2.79	-2.03	0.34	6.9163	4.08405	0.790041
PYL10	29.29	32.7	31.12	30.69	8.11	10.81	9.79	9.47	-2.7	-1.68	-1.36	6.49802	3.20428	2.56685	6.27859	3.27208	2.22093
PYL10	29.22	32.56	31.11	30.18	8.04	10.67	9.78	8.96	-2.63	-1.74	-0.92	6.19026	3.34035	1.89212
PYL10	29.03	32.36	30.89	30.21	7.85	10.47	9.56	8.99	-2.62	-1.71	-1.14	6.1475	3.27161	2.20381
actin	20.94	21.78	21.34	20.98
actin	21.36	21.99	21.09	21.22
actin	21.23	21.89	21.55	21.45
Average	21.1767	21.8867	21.3267	21.2167

## Sheet: 12h VS CK
	0h（CK）	12h			ΔCT	ΔCT			ΔΔCT			2-ΔΔCT			Average
		NACL（T1）	PEG（T2）	ABA（T3）	CK	NACL（T1）	PEG（T2）	ABA（T3）	NACL（T1）	PEG（T2）	ABA（T3）	NACL（T1）	PEG（T2）	ABA（T3）	NACL（T1）	PEG（T2）	ABA（T3）
PYL1	29.41	31.87	31.11	29.8	8.23	9.82	9.49	8.21	-1.59	-1.26	0.02	3.01049	2.39496	0.986233	2.78209	2.56556	0.936907
PYL1	28.32	30.65	30.23	28.95	7.14	8.6	8.61	7.36	-1.46	-1.47	-0.22	2.75108	2.77022	1.16473
PYL1	29.31	31.55	31.09	29.12	8.13	9.5	9.47	7.53	-1.37	-1.34	0.6	2.58471	2.53151	0.659754
PYL2	27.85	30.09	29.23	27.89	6.67	8.04	7.61	6.3	-1.37	-0.94	0.37	2.58471	1.91853	0.773782	2.37755	1.57271	0.657717
PYL2	28.86	30.89	29.76	28.67	7.68	8.84	8.14	7.08	-1.16	-0.46	0.6	2.23457	1.37554	0.659754
PYL2	29.03	31.11	29.98	28.55	7.85	9.06	8.36	6.96	-1.21	-0.51	0.89	2.31338	1.42405	0.539614
PYL3	25.26	22.12	24.33	26.35	4.08	0.07	2.71	4.76	4.01	1.37	-0.68	0.0620683	0.386891	1.60214	0.0664999	0.483831	1.55892
PYL3	25.18	22.04	24.68	26.33	4	-0.01	3.06	4.74	4.01	0.94	-0.74	0.0620683	0.521233	1.67018
PYL3	25.31	22.45	24.87	26.21	4.13	0.4	3.25	4.62	3.73	0.88	-0.49	0.075363	0.543367	1.40444
PYL4	23.16	27.45	25.78	25.89	1.98	5.4	4.16	4.3	-3.42	-2.18	-2.32	10.7034	4.53154	4.99332	11.2422	4.65121	4.8499
PYL4	22.81	27.21	25.54	25.54	1.63	5.16	3.92	3.95	-3.53	-2.29	-2.32	11.5514	4.89056	4.99332
PYL4	23.27	27.66	25.89	25.87	2.09	5.61	4.27	4.28	-3.52	-2.18	-2.19	11.4716	4.53154	4.56305
PYL5	26.55	25.32	25.12	27.88	5.37	3.27	3.5	6.29	2.1	1.87	-0.92	0.233258	0.273573	1.89212	0.20463	0.368614	1.69741
PYL5	26.57	25.11	25.45	27.56	5.39	3.06	3.83	5.97	2.33	1.56	-0.58	0.198884	0.339151	1.49485
PYL5	26.46	24.87	25.88	27.64	5.28	2.82	4.26	6.05	2.46	1.02	-0.77	0.181747	0.493116	1.70527
PYL6	22.91	27.12	25.77	19.55	1.73	5.07	4.15	-2.04	-3.34	-2.42	3.77	10.1261	5.35171	0.0733022	11.1345	5.47895	0.0743288
PYL6	22.98	27.44	25.85	19.81	1.8	5.39	4.23	-1.78	-3.59	-2.43	3.58	12.042	5.38893	0.0836205
PYL6	22.95	27.31	25.9	19.44	1.77	5.26	4.28	-2.15	-3.49	-2.51	3.92	11.2356	5.6962	0.0660636
PYL7	29.31	32.32	32.76	32.12	8.13	10.27	11.14	10.53	-2.14	-3.01	-2.4	4.40762	8.05564	5.27803	4.7324	8.70813	5.84372
PYL7	29.01	32.11	32.66	32.05	7.83	10.06	11.04	10.46	-2.23	-3.21	-2.63	4.69134	9.25351	6.19026
PYL7	28.87	32.09	32.45	31.88	7.69	10.04	10.83	10.29	-2.35	-3.14	-2.6	5.09824	8.81524	6.06287
PYL8	33.33	35.99	33.45	36.45	12.15	13.94	11.83	14.86	-1.79	0.32	-2.71	3.45815	0.80107	6.54322	3.64176	0.764087	6.42404
PYL8	33.15	35.88	33.23	36.22	11.97	13.83	11.61	14.63	-1.86	0.36	-2.66	3.63008	0.779165	6.32033
PYL8	33.17	35.98	33.12	36.26	11.99	13.93	11.5	14.67	-1.94	0.49	-2.68	3.83706	0.712025	6.40856
PYL9	25.46	27.12	25.98	25.25	4.28	5.07	4.36	3.66	-0.79	-0.08	0.62	1.72907	1.05702	0.650671	1.89184	1.06438	0.748873
PYL9	25.44	27.33	26.09	25.68	4.26	5.28	4.47	4.09	-1.02	-0.21	0.17	2.02792	1.15669	0.888843
PYL9	25.71	27.52	26.12	25.62	4.53	5.47	4.5	4.03	-0.94	0.03	0.5	1.91853	0.97942	0.707107
PYL10	29.29	32.77	31.09	30.75	8.11	10.72	9.47	9.16	-2.61	-1.36	-1.05	6.10504	2.56685	2.07053	7.08523	2.8488	2.12918
PYL10	29.22	32.87	31.23	30.75	8.04	10.82	9.61	9.16	-2.78	-1.57	-1.12	6.86852	2.96905	2.17347
PYL10	29.03	32.95	31.06	30.54	7.85	10.9	9.44	8.95	-3.05	-1.59	-1.1	8.28212	3.01049	2.14355
actin	20.94	22.03	21.78	21.36
actin	21.36	22.05	21.73	21.56
actin	21.23	22.06	21.36	21.84
Average	21.1767	22.0467	21.6233	21.5867

## Sheet: 24h VS CK
	0h（CK）	24h			ΔCT	ΔCT			ΔΔCT			2-ΔΔCT			Average
		NACL（T1）	PEG（T2）	ABA（T3）	CK	NACL（T1）	PEG（T2）	ABA（T3）	NACL（T1）	PEG（T2）	ABA（T3）	NACL（T1）	PEG（T2）	ABA（T3）	NACL（T1）	PEG（T2）	ABA（T3）
PYL1	29.41	30.04	30	29.32	8.23	9.09	9.44	8.04	-0.86	-1.21	0.19	1.81504	2.31338	0.876606	2.01522	2.24748	0.98384
PYL1	28.32	29.12	29.12	28.75	7.14	8.17	8.56	7.47	-1.03	-1.42	-0.33	2.04202	2.67586	1.25701
PYL1	29.31	30.21	29.5	29.12	8.13	9.26	8.94	7.84	-1.13	-0.81	0.29	2.18859	1.75321	0.817902
PYL2	27.85	30.11	28.65	27.98	6.67	9.16	8.09	6.7	-2.49	-1.42	-0.03	5.61778	2.67586	1.02101	5.19093	2.40794	0.823553
PYL2	28.86	30.98	29.45	28.45	7.68	10.03	8.89	7.17	-2.35	-1.21	0.51	5.09824	2.31338	0.702222
PYL2	29.03	31.08	29.57	28.71	7.85	10.13	9.01	7.43	-2.28	-1.16	0.42	4.85678	2.23457	0.747425
PYL3	25.26	21.34	23.45	25.6	4.08	0.39	2.89	4.32	3.69	1.19	-0.24	0.0774817	0.438303	1.18099	0.0700547	0.389284	1.24903
PYL3	25.18	21.09	23.12	25.75	4	0.14	2.56	4.47	3.86	1.44	-0.47	0.0688691	0.368567	1.38511
PYL3	25.31	21.11	23.22	25.65	4.13	0.16	2.66	4.37	3.97	1.47	-0.24	0.0638133	0.360982	1.18099
PYL4	23.16	26.2	23.97	25.7	1.98	5.25	3.41	4.42	-3.27	-1.43	-2.44	9.64646	2.69447	5.42642	9.29971	2.34131	5.39005
PYL4	22.81	25.78	23.19	25.37	1.63	4.83	2.63	4.09	-3.2	-1	-2.46	9.18959	2	5.50217
PYL4	23.27	26.22	23.87	25.76	2.09	5.27	3.31	4.48	-3.18	-1.22	-2.39	9.06307	2.32947	5.24157
PYL5	26.55	25.89	24.8	27.11	5.37	4.94	4.24	5.83	0.43	1.13	-0.46	0.742262	0.456916	1.37554	0.826367	0.429549	1.62446
PYL5	26.57	26.07	24.57	27.54	5.39	5.12	4.01	6.26	0.27	1.38	-0.87	0.82932	0.384219	1.82766
PYL5	26.46	26.09	24.68	27.3	5.28	5.14	4.12	6.02	0.14	1.16	-0.74	0.907519	0.447513	1.67018
PYL6	22.91	26.12	22.41	19	1.73	5.17	1.85	-2.28	-3.44	-0.12	4.01	10.8528	1.08673	0.0620683	12.3025	1.16435	0.0523283
PYL6	22.98	26.55	22.43	18.77	1.8	5.6	1.87	-2.51	-3.8	-0.07	4.31	13.9288	1.04972	0.0504151
PYL6	22.95	26.32	22.77	18.56	1.77	5.37	2.21	-2.72	-3.6	-0.44	4.49	12.1257	1.3566	0.0445016
PYL7	29.31	30.89	30.23	31.85	8.13	9.94	9.67	10.57	-1.81	-1.54	-2.44	3.50642	2.90795	5.42642	3.67491	3.0114	5.45473
PYL7	29.01	30.56	30.01	31.5	7.83	9.61	9.45	10.22	-1.78	-1.62	-2.39	3.43426	3.07375	5.24157
PYL7	28.87	30.67	29.86	31.48	7.69	9.72	9.3	10.2	-2.03	-1.61	-2.51	4.08405	3.05252	5.6962
PYL8	33.33	34.67	32.31	34.62	12.15	13.72	11.75	13.34	-1.57	0.4	-1.19	2.96905	0.757858	2.28153	2.60896	0.868655	2.29579
PYL8	33.15	34.23	32.36	34.35	11.97	13.28	11.8	13.07	-1.31	0.17	-1.1	2.47942	0.888843	2.14355
PYL8	33.17	34.19	32.49	34.57	11.99	13.24	11.93	13.29	-1.25	0.06	-1.3	2.37841	0.959264	2.46229
PYL9	25.46	26.88	26.12	24.61	4.28	5.93	5.56	3.33	-1.65	-1.28	0.95	3.13834	2.42839	0.517632	2.99242	2.45717	0.449223
PYL9	25.44	26.71	26.09	24.21	4.26	5.76	5.53	2.93	-1.5	-1.27	1.33	2.82843	2.41162	0.397768
PYL9	25.71	27.07	26.43	24.6	4.53	6.12	5.87	3.32	-1.59	-1.34	1.21	3.01049	2.53151	0.432269
PYL10	29.29	30.3	30.55	30.75	8.11	9.35	9.99	9.47	-1.24	-1.88	-1.36	2.36199	3.68075	2.56685	2.34171	3.47819	2.74196
PYL10	29.22	30.34	30.4	30.78	8.04	9.39	9.84	9.5	-1.35	-1.8	-1.46	2.54912	3.4822	2.75108
PYL10	29.03	29.88	30.12	30.67	7.85	8.93	9.56	9.39	-1.08	-1.71	-1.54	2.11404	3.27161	2.90795
actin	20.94	21.18	20.31	21.38
actin	21.36	20.86	20.21	21.25
actin	21.23	20.8	21.17	21.21
Average	21.1767	20.9467	20.5633	21.28

## Sheet: 0、2、4、8、12、24h
	PYL1				PYL2				PYL3				PYL4				PYL5
	NACL	PEG	ABA		NACL	PEG	ABA		NACL	PEG	ABA		NACL	PEG	ABA		NACL	PEG	ABA
0h	0.757858	0.757858	0.757858		1.65864	1.65864	1.65864		0.993092	0.993092	0.993092		0.946058	0.946058	0.946058		0.986233	0.986233	0.986233
0h	1.61328	1.61328	1.61328		0.823591	0.823591	0.823591		1.04972	1.04972	1.04972		1.20581	1.20581	1.20581		0.972655	0.972655	0.972655
0h	0.812252	0.812252	0.812252		0.732043	0.732043	0.732043		0.959264	0.959264	0.959264		0.876606	0.876606	0.876606		1.04972	1.04972	1.04972
2h	3.63008	1.12506	1.1487		2.49666	1.93187	0.619854		0.0629347	0.586417	0.812252		2.23457	0.920188	2.44528		0.707107	0.594604	1.31951
2h	3.86375	1.04247	1.44393		2.47942	1.32869	0.358489		0.0390103	0.664343	0.986233		2.23457	1.25701	2.42839		0.80107	0.432269	1.18921
2h	3.89062	1.22264	0.784584		2.56685	1.46409	0.343885		0.0328036	0.687771	0.712025		1.3566	1.01396	2.18859		0.747425	0.45376	0.939523
4h	1.05702	2.26577	0.920188		5.73582	2.65737	0.835088		0.0674518	0.528509	1.31951		4.82323	2.31338	3.16017		0.888843	1.19748	1.26576
4h	1.21419	2.80889	1.82766		4.89056	2.23457	0.426317		0.0703162	0.450625	1.48452		4.34694	2.49666	3.97237		0.742262	0.933033	1.54756
4h	0.97942	2.04202	0.61132		5.46416	2.53151	0.386891		0.0607909	0.441351	1.24833		3.94493	2.28153	2.65737		0.946058	1.07177	1.32869
8h	1.98618	1.82766	1.02811		3.68075	2.90795	0.870551		0.0642571	0.408951	1.02811		11.0043	2.20381	4.11246		1.14076	0.167241	1.7411
8h	2.14355	2.12874	2.05623		4.31691	2.51403	0.521233		0.0733022	0.5	1.07177		15.2422	2.41162	5.54044		1.03526	0.205898	1.64718
8h	2.05623	1.98618	1.15669		3.24901	2.80889	0.550953		0.076415	0.450625	1.07177		13.737	2.02792	5.09824		1.64718	0.205898	1.87905
12h	3.01049	2.39496	0.986233		2.58471	1.91853	0.773782		0.0620683	0.386891	1.60214		10.7034	4.53154	4.99332		0.233258	0.273573	1.89212
12h	2.75108	2.77022	1.16473		2.23457	1.37554	0.659754		0.0620683	0.521233	1.67018		11.5514	4.89056	4.99332		0.198884	0.339151	1.49485
12h	2.58471	2.53151	0.659754		2.31338	1.42405	0.539614		0.075363	0.543367	1.40444		11.4716	4.53154	4.56305		0.181747	0.493116	1.70527
24h	1.81504	2.31338	0.876606		5.61778	2.67586	1.02101		0.0774817	0.438303	1.18099		9.64646	2.69447	5.42642		0.742262	0.456916	1.37554
24h	2.04202	2.67586	1.25701		5.09824	2.31338	0.702222		0.0688691	0.368567	1.38511		9.18959	2	5.50217		0.82932	0.384219	1.82766
24h	2.18859	1.75321	0.817902		4.85678	2.23457	0.747425		0.0638133	0.360982	1.18099		9.06307	2.32947	5.24157		0.907519	0.447513	1.67018
	PYL6				PYL7				PYL8				PYL9				PYL10
	NACL	PEG	ABA		NACL	PEG	ABA		NACL	PEG	ABA		NACL	PEG	ABA		NACL	PEG	ABA
0h	1.02811	1.02811	1.02811		0.840896	0.840896	0.840896		0.926588	0.926588	0.926588		1.05702	1.05702	1.05702		0.926588	0.926588	0.926588
0h	0.97942	0.97942	0.97942		1.03526	1.03526	1.03526		1.04972	1.04972	1.04972		1.07177	1.07177	1.07177		0.972655	0.972655	0.972655
0h	1	1	1		1.14076	1.14076	1.14076		1.03526	1.03526	1.03526		0.888843	0.888843	0.888843		1.10957	1.10957	1.10957
2h	3.13834	0.692555	0.0871715		2.65737	1.95884	1.76541		1.41421	1.90528	3.09513		1.31039	1.7411	0.524858		0.993092	1.04247	1.59107
2h	3.36359	0.752623	0.105112		3.03143	1.89212	2.05623		1.86607	1.97247	4.40762		1	1.11729	0.598739		1.64718	1.6245	1.71713
2h	2.88786	0.659754	0.116629		2.8481	1.79005	2.12874		1.07923	2.65737	3.41054		0.823591	1.24833	0.532185		1.28343	1.37554	2.02792
4h	6.77396	1.48452	0.0877778		5.27803	4.16986	1.93187		1.40444	4.11246	5.93809		2.36199	2.36199	0.97942		2.47942	2.28153	1.8025
4h	6.9644	1.31039	0.0865693		5.54044	4.75683	2.2974		2.12874	3.91768	4.85678		2.14355	2.78949	1.02811		3.24901	2.56685	1.70527
4h	6.1475	1.54756	0.0953912		5.31474	4.14106	2.49666		1.59107	4.50023	5.9794		2.69447	2.71321	0.817902		2.71321	2.34567	2.07053
8h	22.6274	3.83706	0.0947323		2.2974	10.6295	6.10504		3.16017	14.3204	8.45614		7.72749	5.31474	0.895025		6.49802	3.20428	2.56685
8h	22.9433	4.34694	0.0727958		2.23457	9.71356	7.01285		2.96905	13.8326	8.33973		7.1602	4.22807	0.858565		6.19026	3.34035	1.89212
8h	20.5348	4.02782	0.0785633		2.62079	9.84916	7.1602		3.50642	12.7286	8.05564		6.9163	4.08405	0.790041		6.1475	3.27161	2.20381
12h	10.1261	5.35171	0.0733022		4.40762	8.05564	5.27803		3.45815	0.80107	6.54322		1.72907	1.05702	0.650671		6.10504	2.56685	2.07053
12h	12.042	5.38893	0.0836205		4.69134	9.25351	6.19026		3.63008	0.779165	6.32033		2.02792	1.15669	0.888843		6.86852	2.96905	2.17347
12h	11.2356	5.6962	0.0660636		5.09824	8.81524	6.06287		3.83706	0.712025	6.40856		1.91853	0.97942	0.707107		8.28212	3.01049	2.14355
24h	10.8528	1.08673	0.0620683		3.50642	2.90795	5.42642		2.96905	0.757858	2.28153		3.13834	2.42839	0.517632		2.36199	3.68075	2.56685
24h	13.9288	1.04972	0.0504151		3.43426	3.07375	5.24157		2.47942	0.888843	2.14355		2.82843	2.41162	0.397768		2.54912	3.4822	2.75108
24h	12.1257	1.3566	0.0445016		4.08405	3.05252	5.6962		2.37841	0.959264	2.46229		3.01049	2.53151	0.432269		2.11404	3.27161	2.90795
